# Supplementary material for: Pupillary Responses to Faces Are Modulated by Familiarity and Rewarding Context
Source: MDPI journal article supplement (doi:10.3390/brainsci11060794), 2021-06-16
Supplement: s1 [file s1]

Supplementary Materials to:

## Pupillary Responses to Faces are Modulated by Familiarity and Rewarding Context

Magdalena Matyjek <sup>1,2,\*</sup>, Mareike Bayer <sup>1,2</sup> and Isabel Dziobek <sup>1,2</sup>

**Table S1. Pairwise comparisons for the effect of face type on the subject ratings of reward value in both tasks (with Holm correction).**

| Contrast                                           | Est.    | Std. Error | z value | p value |
|----------------------------------------------------|---------|------------|---------|---------|
| celebrity.Game - stranger.Game                     | 10.114  | 4.298      | 2.353   | 0.129   |
| celebrity.Passive_task - celebrity.Game            | -12.014 | 3.959      | -3.035  | 0.019   |
| celebrity.Passive_task - stranger.Passive_task     | -26.886 | 4.298      | -6.255  | 0.000   |
| experimenter.Game - celebrity.Game                 | 20.714  | 4.771      | 4.342   | 0.000   |
| experimenter.Game - stranger.Game                  | 30.829  | 4.112      | 7.497   | 0.000   |
| experimenter.Passive_task - celebrity.Passive_task | -3.186  | 4.771      | -0.668  | 0.979   |
| experimenter.Passive_task - experimenter.Game      | -35.914 | 3.959      | -9.072  | 0.000   |
| experimenter.Passive_task - stranger.Passive_task  | -30.071 | 4.112      | -7.313  | 0.000   |
| stranger.Passive_task - stranger.Game              | 24.986  | 3.959      | 6.312   | 0.000   |

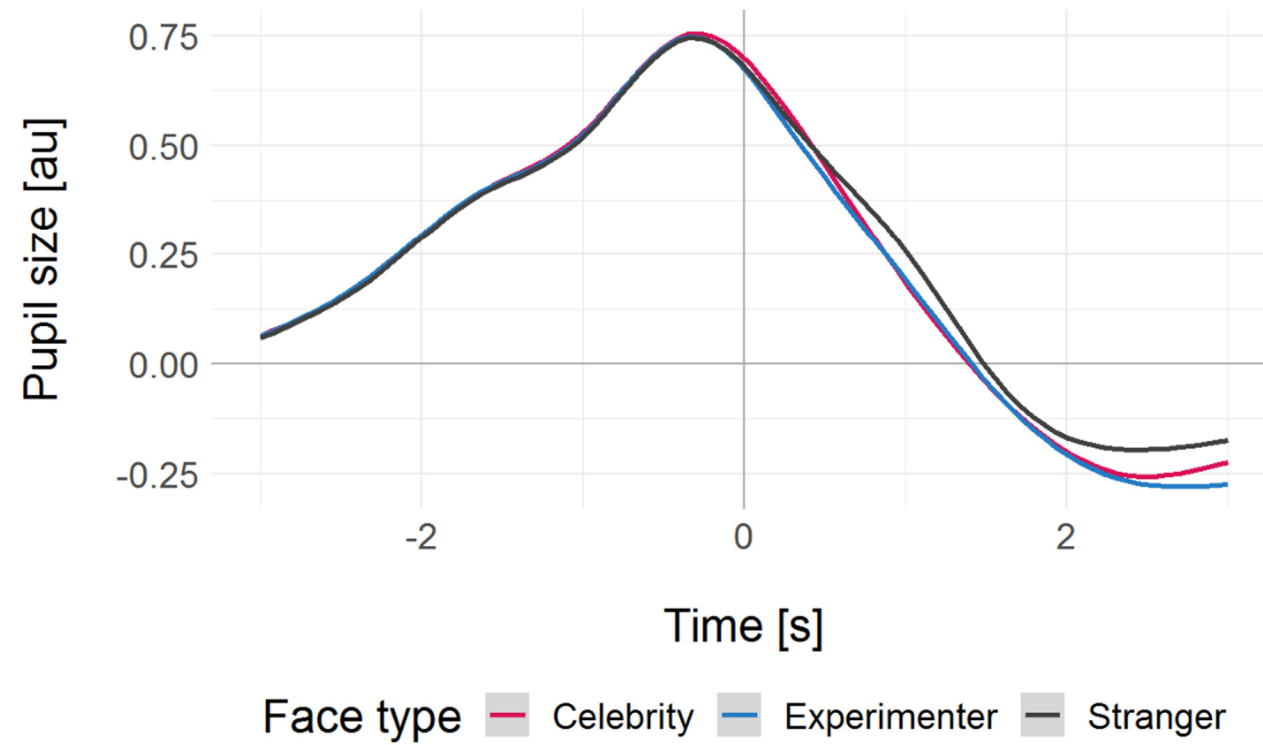

**Figure S1. Plot of the pupillary responses across face types in the game - time-locked to the onset of the face presentation.**

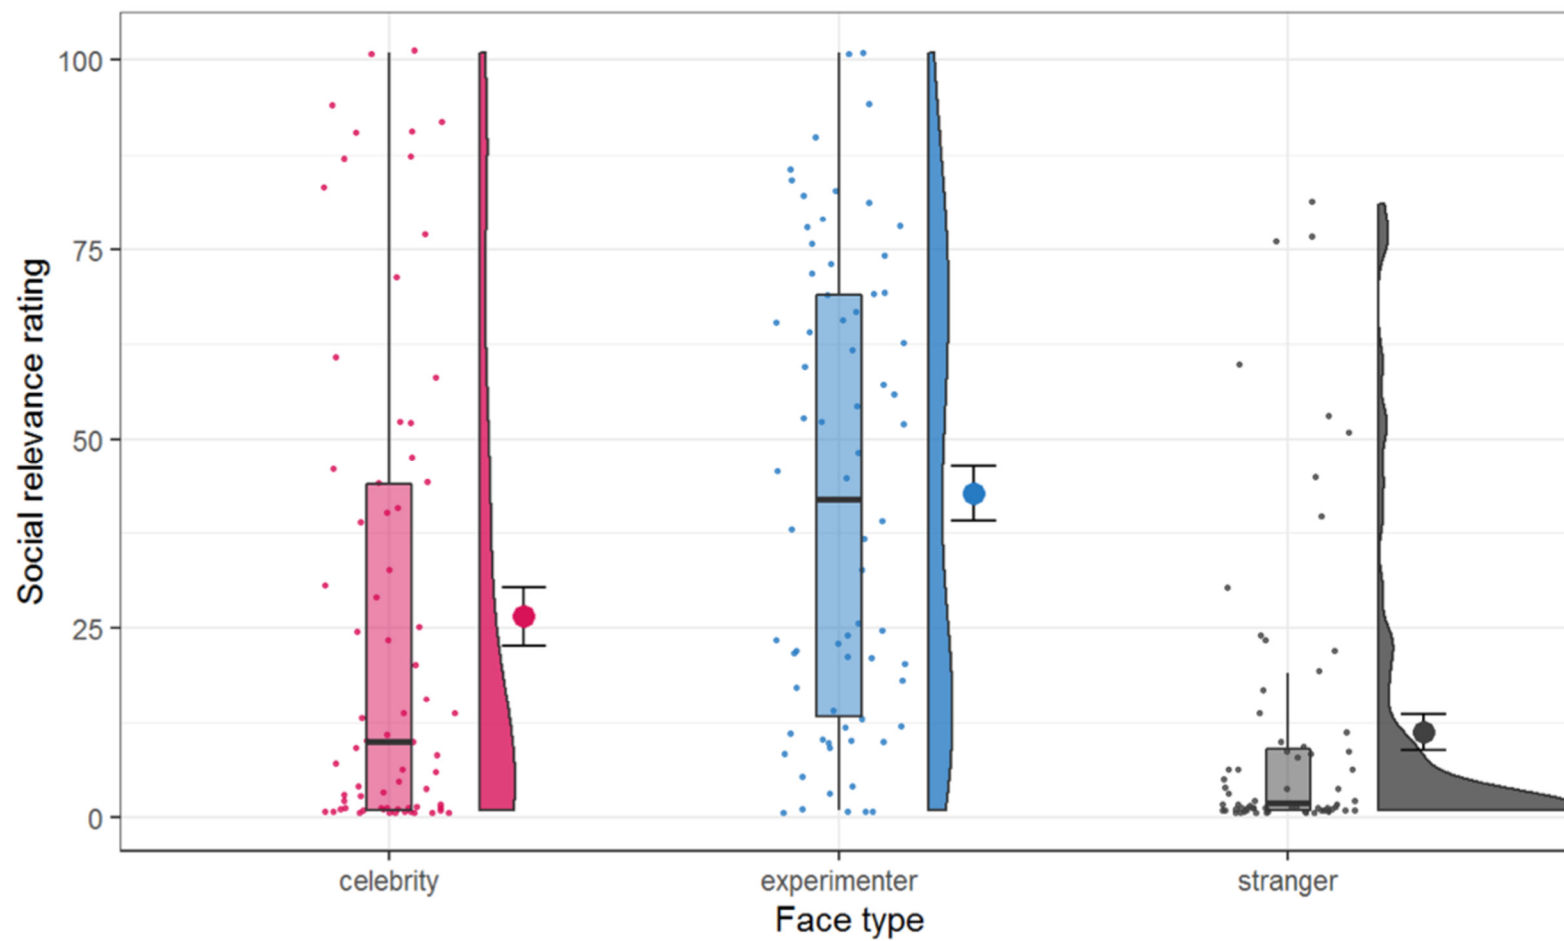

**Figure S2. Subjective ratings of feedback's social relevance in the game and the passive task.** The plot portraits: raw data points, boxplot, violin plot, and means with error bars marking standard deviation.

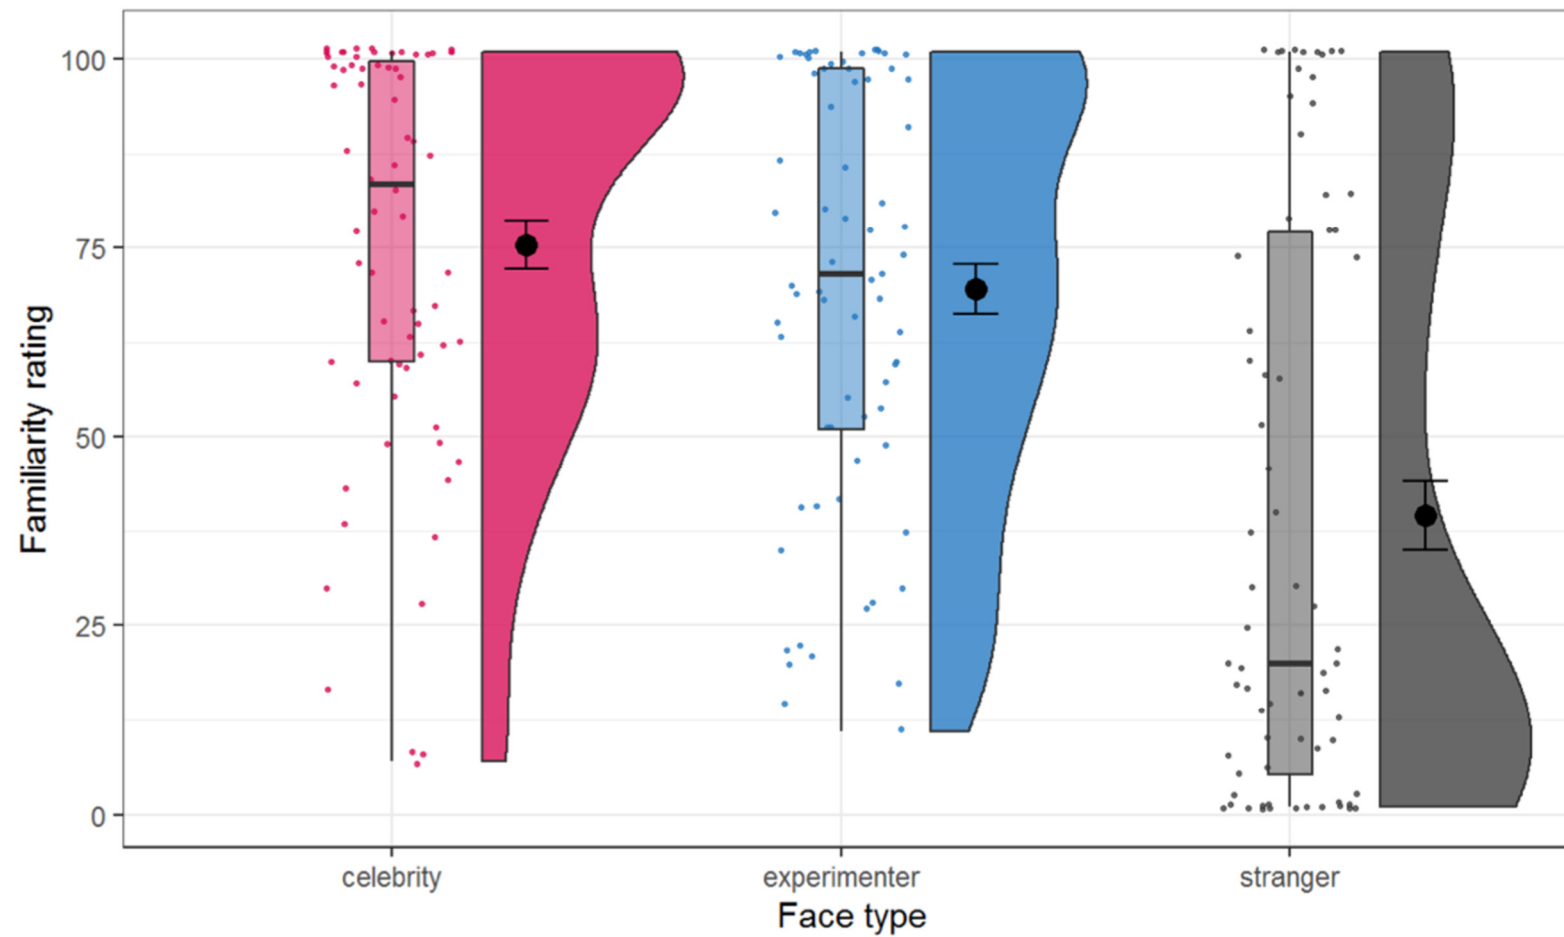

**Figure S3. Subjective ratings of feedback's familiarity in the game and the passive task.** The plot portrays: raw data points, boxplot, violin plot, and means with error bars marking standard deviation.
